# Supplementary material for: Discrimination and control of the exciton-recombination region of thermal-stressed blue organic light-emitting diodes
Source: Royal Society of Chemistry journal article supplement (doi:10.1039/d2cp05600c), 2022-12-30
Supplement: d2cp05600c1.pdf [file d2cp05600c1.pdf]

## Supplementary Information

### **Discrimination and control of the exciton-recombination region of thermal-stressed blue organic light-emitting diodes**

Hanfei Xu<sup>a</sup>, Chenhui Cao<sup>b</sup>, Xinfeng Shui<sup>b</sup>, Jialu Gu<sup>c</sup>, Yanqiu Sun<sup>d</sup>, Lei Ding<sup>\*,d</sup>, Yang Lin<sup>\*,c</sup>, Wei Shi<sup>\*,c</sup>, Bin Wei<sup>c</sup>

<sup>a</sup> School of Materials Science and Engineering, Shanghai University, Shanghai 200072, China

<sup>b</sup> Anhui Sholon New Material Technology Co., Ltd., Chuzhou, Anhui Province, 239500, China

<sup>c</sup> Key Laboratory of Advanced Display and System Applications, Ministry of Education, School of Mechatronic Engineering and Automation, Shanghai University, Shanghai 200072, China

<sup>d</sup> School of Chemistry and Life Sciences, Suzhou University of Science and Technology, Suzhou, 215009, China

\* Corresponding authors: Lei Ding, Yang Lin, Wei Shi

Email: dinglei@usts.edu.cn, ylin@i.shu.edu.cn, shiwei@shu.edu.cn

## Experimental

The indium tin oxide (ITO, 10  $\Omega$ /sheet, 150 nm, active area was 4 mm<sup>2</sup>) coated glass substrate was cleaned with detergent, de-ionized water, acetone, and isopropanol in sequence for 15 min. The cleaned substrates were exposed to UV-ozone for 15 minutes. All the devices were fabricated by thermally depositing the organic layers and cathode onto the ITO coated substrates under a base pressure of below  $2.0 \times 10^{-5}$  mbar. The typical deposition rates of organic materials, lithium-8-hydroxyquinolinolate (Liq) and aluminum (Al) was 0.8, 0.2 and 5.0  $\text{\AA s}^{-1}$ , respectively.

OLEDs were tested at room temperature (RT), 60°C, 80°C and 100°C for 30 minutes in N<sub>2</sub> atmosphere, respectively. The current-voltage-luminescence characteristics were measured by a Keithley 2400 source meter and a PR-650 Spectra Colorimeter. The luminance and spectra were measured in the direction perpendicular to the substrate. The photoluminescence (PL) characteristics were performed on a single-photon counting from Edinburgh Analytical Instruments (FLSP 920) equipped with a continuous Xe-900 Xenon lamp, a  $\mu$ F900 microsecond flash lamp, and a 400 nm light filter.

The SCLC property could be described via the Mott-Gurney equation:

$$\begin{aligned} J &= \frac{9}{8} \varepsilon_0 \varepsilon_r \mu \frac{E^2}{L} \\ &= \frac{9}{8} \varepsilon_0 \varepsilon_r \frac{V^2}{L^3} \mu_0 \exp(0.891\gamma \sqrt{\frac{V}{L}}) \end{aligned} \quad (1)$$

where  $\varepsilon_0$  is the free-space permittivity ( $8.85 \times 10^{-14}$  C V<sup>-1</sup> cm<sup>-1</sup>),  $\varepsilon_r$  is the relative dielectric constant (assumed to be 3.0 for organic semiconductors),  $E$  is the electric field,  $\mu_0$  is the zero-field mobility,  $\gamma$  is the Poole-Frenkel factor, and  $L$  is the thickness of each film. The carrier mobility ( $\mu$ ) could be calculated according to the Poole-Frenkel formula:

$$\mu = \mu_0 \exp(\gamma \sqrt{E}) \quad (2)$$

By fitting the current density–voltage curves in the SCLC region according to Eq. 1, the values of  $\mu_0$  and  $\gamma$  are obtained, thus generating the field-dependent carrier mobility by Eq. 2.

**Figure S1.** The EL spectra of DCJTb at (a) 4 V and (b) 12 V when annealed at different temperatures.

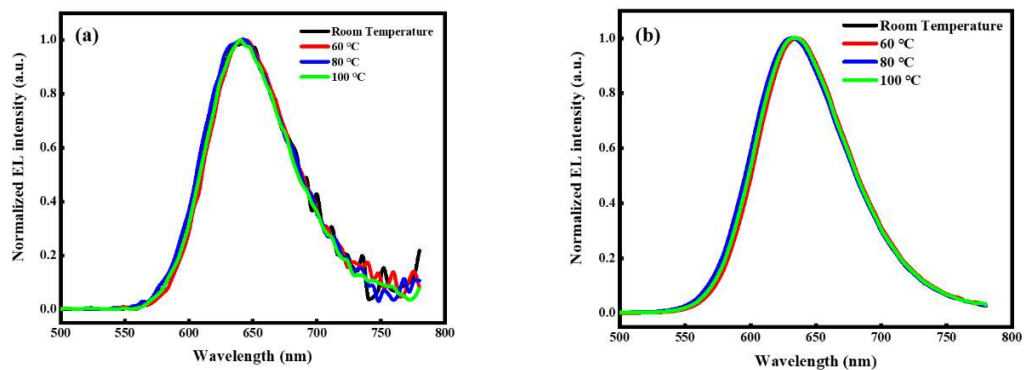

**Figure S2.** The EL spectra of Rubrene at (a) 4 V and (b) 12 V when annealed at different temperatures.

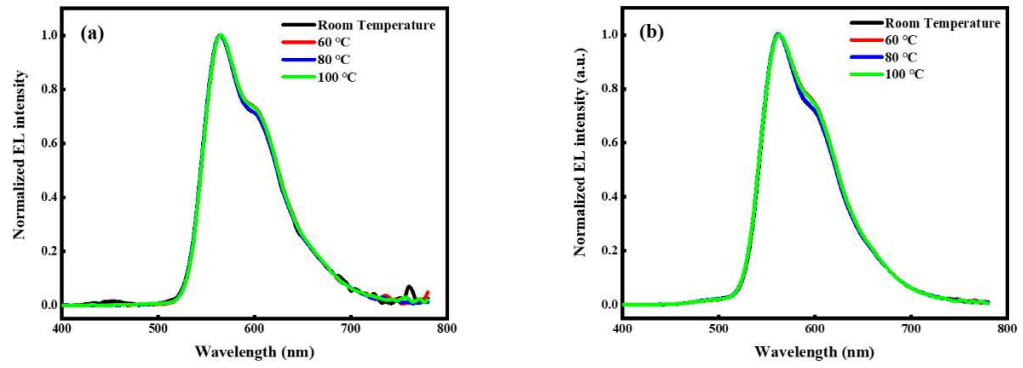

**Figure S3.** The EL spectra and fitting of peaks of the pristine device tested at (a) 4 V and (b) 12 V when annealed at RT. The EL spectra and fitting of peaks of the optimized device tested at (c) 4 V and (d) 12 V when annealed at RT.

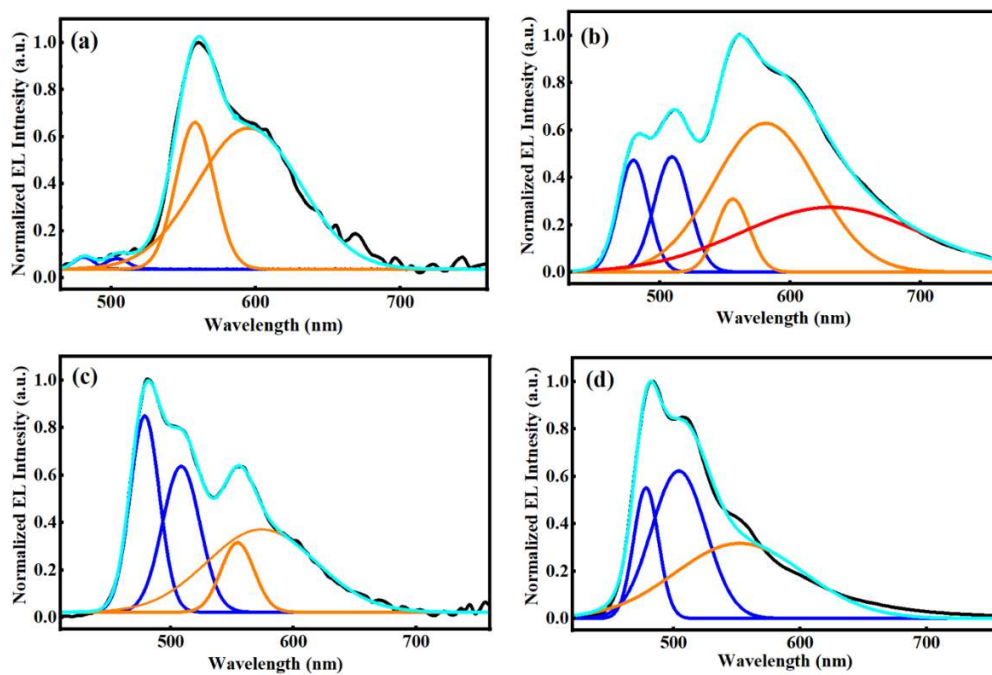

**Figure S4.** The EL spectra and fitting of peaks of the pristine device tested at (a) 4 V and (b) 12 V when annealed temperature was 60 °C. The EL spectra and fitting of peaks of the optimized device tested at (c) 4 V and (d) 12 V when annealed temperature was 60 °C.

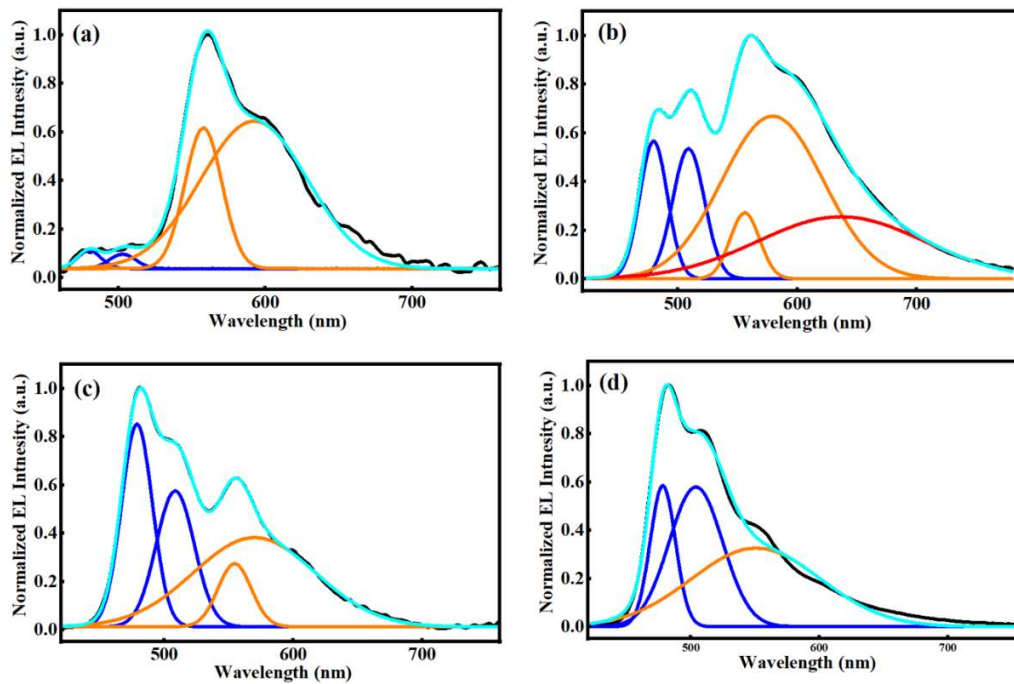

**Figure S5.** The EL spectra and fitting of peaks of the pristine device tested at (a) 4 V and (b) 12 V when annealed temperature was 100 °C. The EL spectra and fitting of peaks of the optimized device tested at (c) 4 V and (d) 12 V when annealed temperature was 100 °C.

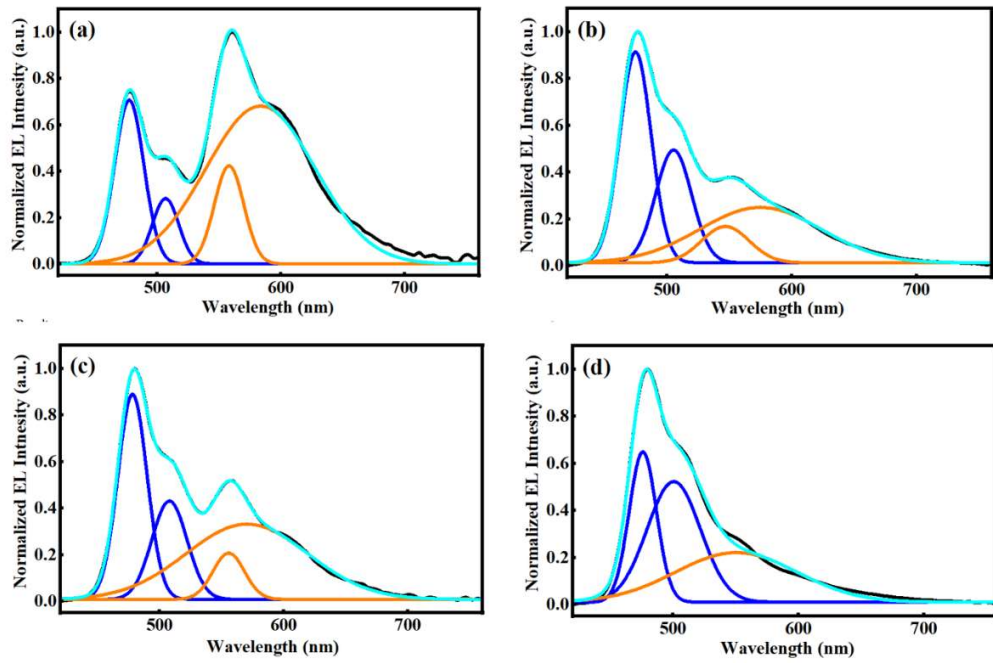

**Figure S6.** EL spectrum of DSA-ph and absorption spectrum of DCJTb and Rubrene at room temperature.

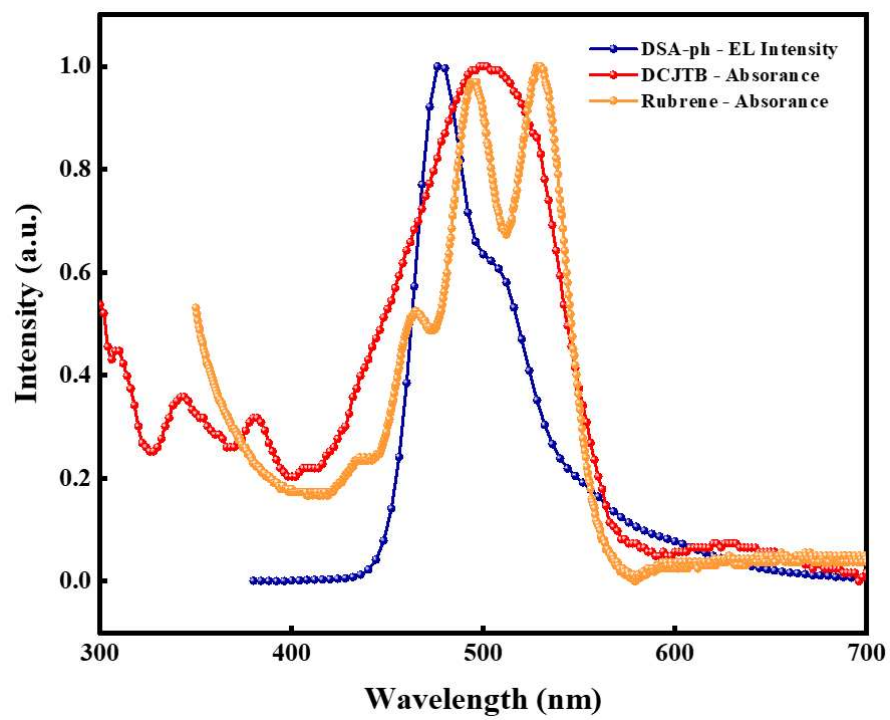

**Figure S7.** Different color peaks percentage of relative intensity at 80°C.

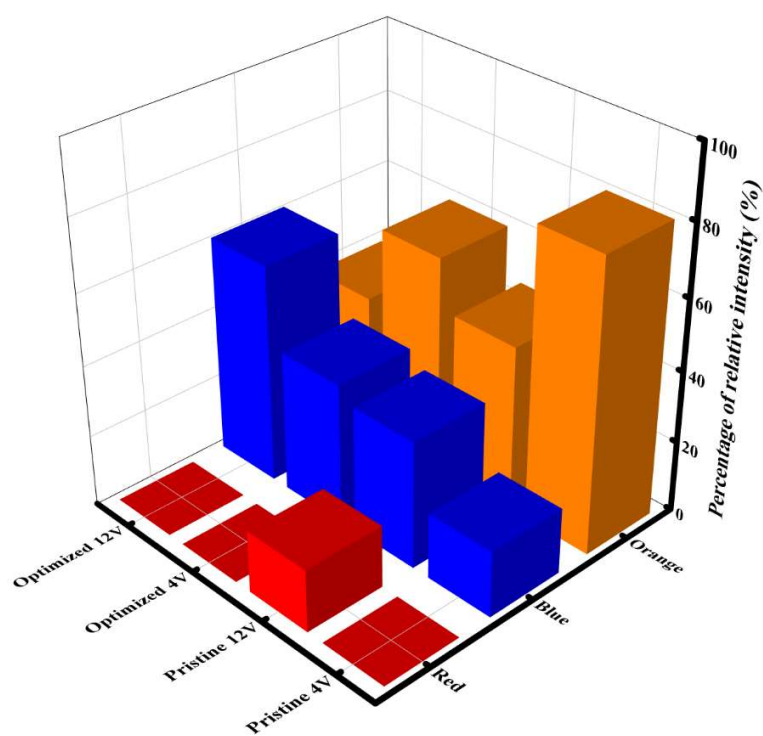

**Table S1.** Carrier mobility of single-carrier cells at different temperatures

| Annealed<br>temperature | Pristine mobility<br>(cm <sup>2</sup> /V s) |                       | Optimized mobility<br>(cm <sup>2</sup> /V s) |                       |
|-------------------------|---------------------------------------------|-----------------------|----------------------------------------------|-----------------------|
|                         | Hole-only                                   | Electron-only         | Hole-only                                    | Electron-only         |
| RT                      | 9.02×10 <sup>-4</sup>                       | 2.71×10 <sup>-5</sup> | 2.83×10 <sup>-4</sup>                        | 5.69×10 <sup>-5</sup> |
| 60 °C                   | 1.37×10 <sup>-3</sup>                       | 3.14×10 <sup>-5</sup> | 3.75×10 <sup>-4</sup>                        | 5.21×10 <sup>-5</sup> |
| 80 °C                   | 7.94×10 <sup>-4</sup>                       | 9.19×10 <sup>-6</sup> | 2.58×10 <sup>-4</sup>                        | 1.27×10 <sup>-4</sup> |
| 100 °C                  | 7.61×10 <sup>-4</sup>                       | 5.99×10 <sup>-6</sup> | 3.65×10 <sup>-4</sup>                        | 1.20×10 <sup>-4</sup> |

**Table S2.** Area percentage of different color tested at 4 V and 12 V under 80 °C.

| Emitter          | Wave peak (nm) |           | Area (a.u.) |           | FWHM <sup>a</sup> (nm) |           | Area percentage (%) |           |
|------------------|----------------|-----------|-------------|-----------|------------------------|-----------|---------------------|-----------|
|                  | Pristine       | Optimized | Pristine    | Optimized | Pristine               | Optimized | Pristine            | Optimized |
|                  | 4V/12V         | 4V/8V     | 4V/12V      | 4V/12V    | 4V/12V                 | 4V/12V    | 4V/12V              | 4V/12V    |
| Blue             | 478/476        | 478/475   | 16/27       | 27/18     | 28/29                  | 28/26     | 14/23               | 27/25     |
| Blue side-peak   | 506/506        | 508/500   | 5/15        | 12/27     | 23/32                  | 31/52     | 5/13                | 13/36     |
| Orange           | 559/557        | 557/551   | 14/1        | 7/29      | 29/24                  | 28/117    | 12/1                | 7/39      |
| Orange side-peak | 590/579        | 573/-     | 77/53       | 53/-      | 103/121                | 112/-     | 69/45               | 53/-      |
| Red              | -/640          | -/-       | -/21        | -/-       | -/196                  | -/-       | -/18                | -/-       |

<sup>a</sup> full width at half maxima

**Table S3.** Electrical characteristics of devices at different temperatures

| Annealed<br>Temperature | $V_{on}$<br>(V) |           | $CE_{max}$<br>( $cd \cdot A^{-1}$ ) |           | $PE(@CE_{max})$<br>( $lm \cdot W^{-1}$ ) |           | $EQE(@CE_{max})$<br>(%) |           |
|-------------------------|-----------------|-----------|-------------------------------------|-----------|------------------------------------------|-----------|-------------------------|-----------|
|                         | Pristine        | Optimized | Pristine                            | Optimized | Pristine                                 | Optimized | Pristine                | Optimized |
| RT                      | 3.1             | 3.2       | 12.84                               | 10.14     | 5.04                                     | 3.75      | 6.33                    | 4.86      |
| 60°C                    | 3.2             | 3.2       | 10.22                               | 10.88     | 3.38                                     | 4.27      | 5.05                    | 5.21      |
| 80°C                    | 3.4             | 3.2       | 11.86                               | 12.07     | 4.96                                     | 5.83      | 5.13                    | 5.44      |
| 100°C                   | 3.2             | 3.2       | 10.85                               | 13.44     | 4.63                                     | 6.49      | 4.76                    | 6.01      |
